# Supplementary material
Source: Research Square preprint supplement (doi:10.21203/rs.3.rs-9027461/v1)
Supplement: Supplementary file 2 [file 43d4f413ec2a70e95066cc9f.docx]

**Supplementary Tables**

**Table S1. Model fit criteria for latent class mixed modeling (LCMM) of longitudinal phosphate trajectories in the MIMIC-IV derivation cohort**

| **Number of Classes** | **Bayesian Information Criterion (BIC)** | **Akaike Information Criterion (AIC)** | **Average Maximum Posterior Probability (AveMaxPP)** | **Log Likelihood** | **%class1** | **%class2** | **%class3** | **%class4** |
| --- | --- | --- | --- | --- | --- | --- | --- | --- |
| 1 | 166645.4 | 166617.4 | 1 | -83304.7 | 100 | NA | NA | NA |
| 2 | 150956.9 | 150901 | 0.98 | -75442.5 | 88.97 | 11.02 | NA | NA |
| 3 | 143336 | 143252.1 | 0.93 | -71614 | 3.07 | 29.63 | 67.28717 | NA |
| 4 | 140019.5 | 139907.6 | 0.90 | -69937.8 | 1.98 | 38.81 | 7.930007 | 51.26582 |

Model fit statistics for latent class mixed models with 1 to 4 classes in the derivation cohort are presented. The three-class solution was selected as the optimal model based on the lowest Bayesian Information Criterion (BIC) among models with adequate class size and acceptable classification performance. Although the four-class model showed further reduction in BIC and AIC, it yielded a very small class (<5%) and reduced classification certainty (AveMaxPP = 0.90). The three-class model demonstrated good discrimination (AveMaxPP = 0.93) with clinically interpretable class distribution.

Abbreviations: BIC, Bayesian Information Criterion; AIC, Akaike Information Criterion; AveMaxPP, Average Maximum Posterior Probability; LCMM, latent class mixed model.

**Table S2. Baseline characteristics of the eICU-CRD validation cohort according to phosphate trajectory pattern**

|  | **Overall**  **(n=12049)** | **Low**  **(n=8153)** | **Normal**  **(n=3091)** | **Persistent High(n=805)** | **P** |
| --- | --- | --- | --- | --- | --- |
| Age (years) | 64.00 [53.00, 75.00] | 64.00 [53.00, 75.00] | 64.00 [53.00, 75.00] | 62.00 [52.00, 72.00] | 0.001 |
| Male (%) | 6641 (55.1) | 4379 (53.7) | 1770 (57.3) | 492 (61.1) | <0.001 |
| APACHE IV score | 78.00 [59.00, 98.00] | 75.00 [57.00, 94.00] | 83.00 [63.00, 106.00] | 90.00 [69.00, 110.00] | <0.001 |
| Creatinine (mg/dL) | 1.19 [0.80, 2.10] | 1.00 [0.70, 1.50] | 1.90 [1.14, 3.11] | 3.76 [2.28, 5.90] | <0.001 |
| Albumin (g/dL) | 2.82 (2.05) | 2.86 (2.02) | 2.78 (2.08) | 2.68 (2.22) | 0.091 |
| Total calcium (mg/dL) | 7.90 (0.89) | 7.90 (0.85) | 7.93 (0.93) | 7.75 (1.00) | <0.001 |
| pH | 7.31 (0.15) | 7.33 (0.13) | 7.29 (0.16) | 7.22 (0.18) | <0.001 |
| Lactate (mmol/L) | 2.10 [1.30, 3.80] | 2.00 [1.30, 3.40] | 2.20 [1.30, 4.80] | 2.40 [1.30, 5.70] | <0.001 |
| PaO₂ (mmHg) | 84.80 [66.88, 118.00] | 86.00 [67.00, 120.00] | 82.00 [66.00, 114.10] | 83.00 [67.00, 109.35] | <0.001 |
| PEEP (cmH₂O) | 5.00 [5.00, 7.14] | 5.00 [5.00, 6.67] | 5.00 [5.00, 8.00] | 5.00 [5.00, 8.00] | <0.001 |
| FiO₂ (%) | 50.00 [40.00, 61.43] | 48.75 [40.00, 60.00] | 50.32 [41.25, 65.89] | 51.10 [42.54, 66.67] | <0.001 |
| Vasopressor use (%) | 4116 (34.2) | 2690 (33.0) | 1119 (36.2) | 307 (38.1) | <0.001 |
| Hospital mortality (%) | 2796 (23.2) | 1646 (20.2) | 842 (27.2) | 308 (38.3) | <0.001 |

Baseline variables include demographic characteristics, illness severity (APACHE IV), renal and hepatic biomarkers, acid–base parameters, oxygenation indices, ventilatory settings, vasopressor use, and hospital mortality. All measurements were obtained near Time Zero (T₀), defined as initiation of respiratory support. Continuous variables are presented as median [IQR] or mean (SD), as appropriate; categorical variables are expressed as counts (%). P values represent comparisons across the Low, Normal, and Persistent High trajectory patterns.

**Abbreviations: APACHE IV, Acute Physiology and Chronic Health Evaluation IV; ARDS, acute respiratory distress syndrome; eICU-CRD, eICU Collaborative Research Database; FiO₂, fraction of inspired oxygen; PEEP, positive end-expiratory pressure; T₀, time zero (initiation of respiratory support).**

**Table S3. Baseline characteristics in the propensity score–matched cohort comparing Persistent High and Normal phosphate trajectory patterns (MIMIC-IV)**

| **Variable** | **Normal   (n = 248)** | **Persistent-High   (n = 248)** | **P** | **Standardized Mean Difference** |
| --- | --- | --- | --- | --- |
| Age (years) | 64.67 (13.92) | 65.27 (13.95) | 0.634 | 0.043 |
| Male (%) | 183 (73.8) | 180 (72.6) | 0.839 | 0.027 |
| SOFA score | 3 [1, 6] | 3 [1, 6] | 0.537 | 0.015 |
| Charlson Comorbidity Index | 6 [4, 8] | 6 [4, 8] | 0.790 | 0.004 |
| Creatinine (mg/dL) | 1.60 [1.00, 2.60] | 1.60 [1.00, 2.60] | 0.529 | 0.076 |
| Total calcium (mg/dL) | 8.64 (1.10) | 8.64 (1.10) | 0.949 | 0.006 |
| pH | 7.31 (0.10) | 7.31 (0.10) | 0.785 | 0.025 |
| Lactate (mmol/L) | 2.05 [1.50, 3.32] | 2.05 [1.50, 3.32] | 0.757 | 0.090 |
| PaO₂/FiO₂ ratio (mmHg) | 148.5 [90.0, 186.1] | 148.5 [90.0, 186.1] | 0.551 | 0.008 |

Propensity score matching was performed using 1:1 nearest-neighbor matching with a caliper width of 0.2 standard deviations, without replacement. The propensity score model included age, sex, SOFA score, Charlson Comorbidity Index, baseline creatinine, total calcium, pH, lactate, and PaO₂/FiO₂ ratio. Continuous variables are presented as median [IQR] or mean (SD), and categorical variables as n (%). Adequate covariate balance was defined as a standardized mean difference (SMD) < 0.1.

Abbreviations: SMD, standardized mean difference; SOFA, Sequential Organ Failure Assessment; PaO₂/FiO₂, arterial oxygen partial pressure to fraction of inspired oxygen ratio.

**Table S4. Baseline characteristics in the propensity score–matched cohort comparing Persistent High and Low phosphate trajectory patterns (MIMIC-IV)**

| **Variable** | **Low   (n = 248)** | **Persistent-High  (n = 248)** | **P** | **Standardized Mean Difference** |
| --- | --- | --- | --- | --- |
| Age (years) | 65.62 (14.34) | 65.27 (13.95) | 0.785 | 0.025 |
| Male (%) | 182 (73.4) | 180 (72.6) | 0.919 | 0.018 |
| SOFA score | 3 [1, 6] | 3 [1, 6] | 0.887 | 0.005 |
| Charlson Comorbidity Index | 6 [4, 8] | 6 [4, 8] | 0.286 | 0.104 |
| Creatinine (mg/dL) | 1.60 [1.00, 2.60] | 1.60 [1.00, 2.60] | 0.589 | 0.081 |
| Total calcium (mg/dL) | 8.64 (1.10) | 8.64 (1.10) | 0.961 | 0.008 |
| pH | 7.31 (0.10) | 7.31 (0.10) | 0.833 | 0.021 |
| Lactate (mmol/L) | 2.05 [1.50, 3.32] | 2.05 [1.50, 3.32] | 0.753 | 0.062 |
| PaO₂/FiO₂ ratio (mmHg) | 148.5 [90.0, 186.1] | 148.5 [90.0, 186.1] | 0.551 | 0.008 |

Propensity score matching was performed using 1:1 nearest-neighbor matching with a caliper width of 0.2 standard deviations, without replacement. The propensity score model included age, sex, SOFA score, Charlson Comorbidity Index, baseline creatinine, total calcium, pH, lactate, and PaO₂/FiO₂ ratio. Continuous variables are presented as median [IQR] or mean (SD), and categorical variables as n (%). Adequate covariate balance was defined as a standardized mean difference (SMD) < 0.1.

Abbreviations: SMD, standardized mean difference; SOFA, Sequential Organ Failure Assessment; PaO₂/FiO₂, arterial oxygen partial pressure to fraction of inspired oxygen ratio.

**Table S5. Definitions and operational criteria for variables in the derivation and validation cohorts**

| **Category** | **Variable Name** | **Definition or Criteria** | **Database Specific Notes** |
| --- | --- | --- | --- |
| Core Definition | Time Zero (T₀) | Timestamp of initiation of respiratory support (invasive mechanical ventilation, NIV, or HFNC). | MIMIC-IV: First timestamp of continuous ventilation.  eICU-CRD: Earliest timestamp of mechanical ventilation recorded within 24h of ICU admission. |
| Inclusion Criteria | Study Cohort | Adult patients (age ≥ 18) with ARDS/Respiratory Failure requiring respiratory support, with ICU stay ≥ 48 hours. | MIMIC-IV: ARDS was identified in accordance with the 2023 Global Definition, incorporating invasive and non-invasive respiratory support and oxygenation criteria (PaO₂/FiO₂ or SpO₂/FiO₂), with Berlin-defined ventilated ARDS (PaO₂/FiO₂ ≤ 300 mmHg and PEEP ≥ 5 cmH₂O) examined in sensitivity analyses.  eICU-CRD: Due to differences in data availability, ARDS was operationally defined using documented ARDS or acute respiratory failure diagnoses, invasive mechanical ventilation, and PaO₂/FiO₂ < 300 mmHg, approximating the Berlin-defined ventilated ARDS subset. |
| Exposure | Serum Phosphate | Serum inorganic phosphate levels measured within 7 days after T₀. | Unit: mg/dL. Values in mmol/L were converted (mg/dL = mmol/L * 3.1). Implausible extreme values were excluded based on predefined physiological limits. |
| Exposure | Phosphate Trajectories | Longitudinal trajectory patterns identified using latent class mixed models (LCMM) with “days since T₀” as the time axis. | Class 1 (Low), Class 2 (Normal), Class 3 (Persistent High). |
| Outcome | 30-Day Mortality | Death from any cause occurring within 30 days from T₀. (Primary Outcome) | Derived from hospital discharge status or date of death records. |
| Outcome | Hospital Mortality | Death recorded within the hospital stay during the index admission. (Secondary Outcome) | - |
| Covariates | Baseline Characteristics | Clinical variables (Labs, Vitals, Scores) extracted within a window of T0 – 24 to T0 + 6 hours | To reflect patient status at the onset of respiratory support. |
| Covariates | Severity Scores | SOFA (MIMIC-IV) and APACHE IV (eICU-CRD) calculated using data from the first 24 hours of ICU admission. | Used for severity adjustment. |
| Treatment | Vasopressor Use | Administration of norepinephrine, epinephrine, dopamine, phenylephrine, or vasopressin within T₀ +/- 24 hours. | Continuous infusion records. |
| Comorbidities | Charlson Comorbidity Index (CCI) | Calculated using ICD-9/10 diagnosis codes recorded at hospital discharge. | Standard weights applied. |

This table details the standardized definitions and operational criteria applied to key study variables, including eligibility criteria, exposure definitions (serum phosphate trajectory patterns), primary and secondary outcomes, comorbidities, severity measures, and treatment variables. Time Zero (T₀) was defined as the initiation of respiratory support. Database-specific extraction and harmonization procedures for MIMIC-IV and eICU-CRD are presented to facilitate consistent interpretation across cohorts.
